# Supplementary material for: Self-assembly of ultrathin Cu2MoS4 nanobelts for highly efficient visible light-driven degradation of methyl orange
Source: Royal Society of Chemistry journal article supplement (doi:10.1039/c5nr04741b), 2015-01-01
Supplement: c5nr04741b1.pdf [file c5nr04741b1.pdf]

## *Supplementary Information*

### **Self-assembly ultrathin Cu<sub>2</sub>MoS<sub>4</sub> nanobelts for high efficient visible light-driven degradation of methyl orange**

Ke Zhang<sup>‡</sup>, Wenxing Chen<sup>‡</sup>, Yunxiang Lin, Haiping Chen, Yasir A. Haleem, Chuanqiang Wu, Fei Ye, Tianxing Wang, Li Song\*

National Synchrotron Radiation Laboratory, University of Science and Technology of China, Hefei, Anhui 230029, China

<sup>‡</sup>These authors contributed equally to this work.

\*Corresponding author: [song2012@ustc.edu.cn](mailto:song2012@ustc.edu.cn)

#### ***Supplemental Methods***

**Synthesis of Cu<sub>2</sub>O nanospheres.** The Cu<sub>2</sub>O nanospheres was synthesised by a modified method.<sup>[1]</sup> Typically, 0.171 g of CuCl<sub>2</sub>·H<sub>2</sub>O and 3.333 g of poly (vinyl pyrrolidone) (PVP) were dissolved in 100 mL of deionized water; an aqueous solution of NaOH (2.0 M, 10.0 mL) and aqueous ascorbic acid solution (0.6 M, 10.0 mL) were then successively added dropwise with intense magnetic stirring. After 1 h, a turbid yellow liquid formed. All previous procedures were carried out at room temperature. The product was collected by centrifugation and subsequently washed with deionized water and absolute ethanol several times; it was finally dried at 60 °C under vacuum for several hours

**Synthesis of Cu<sub>2</sub>MoS<sub>4</sub> nanosheets.** Cu<sub>2</sub>MoS<sub>4</sub> with sheet-like morphology was synthesized by using a hydrothermal method in our previous work.<sup>[2]</sup> Here, in order to obtain self-assembled belt-like samples, 30 mg sodium molybdate (Na<sub>2</sub>MoO<sub>4</sub>·2H<sub>2</sub>O) and 60 mg thioacetamide (C<sub>2</sub>H<sub>5</sub>NS) were firstly dissolved in 20 mL ethylene glycol, and then 20 mg (as-synthesized) Cu<sub>2</sub>O powder was added and dispersed in the mixed solution by sonication for 5min. After

stirring for 5 min, the mixture turned its color from yellow to dark brown. Then, the mixture was transferred into a 45 mL Teflon-lined stainless steel autoclave and maintained at 190~210 °C for 24 h. The final products were washed with deionized water and ethanol for several times to remove any possible ions, and then dried at 60 °C under vacuum for a couple of hours.

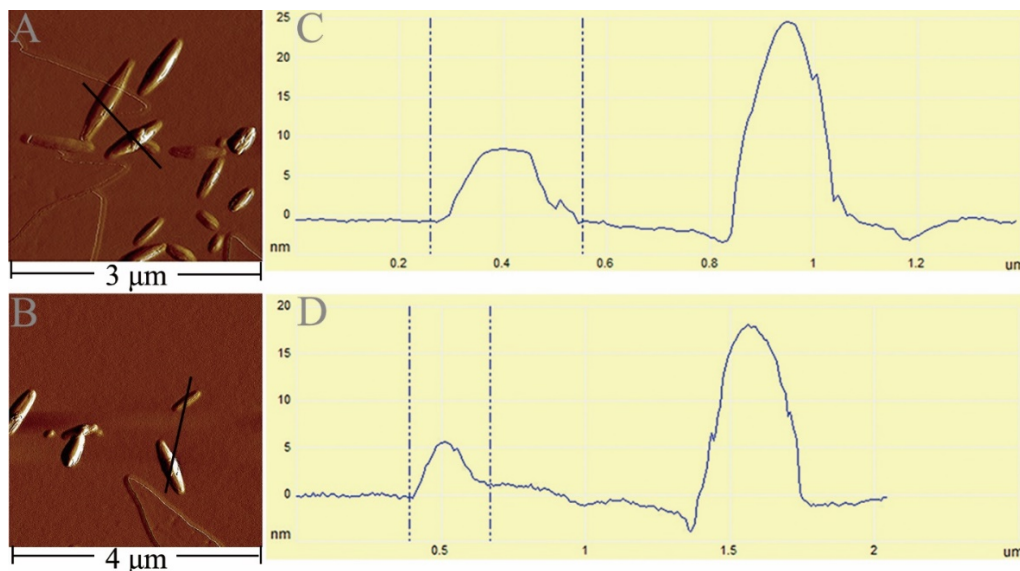

**Figure S1.** AFM images of (A, B)  $\text{Cu}_2\text{MoS}_4$  nanobelt; profile analyses along the line (C, D)

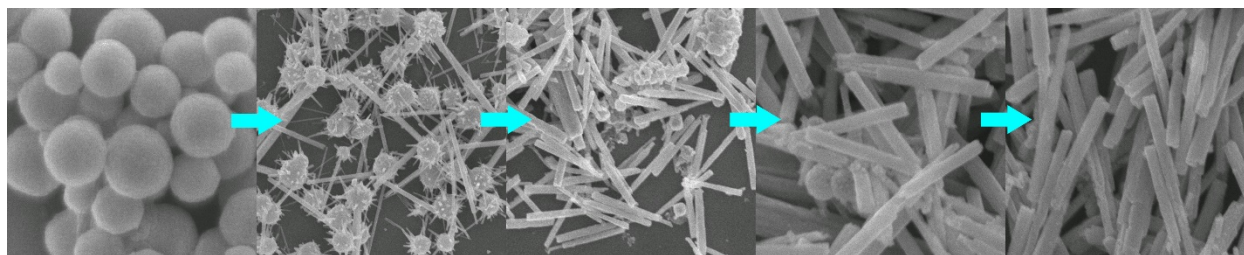

**Figure S2.** SEM images of samples at different reaction times 0 h, 3 h, 6h, 9 h, 12h.

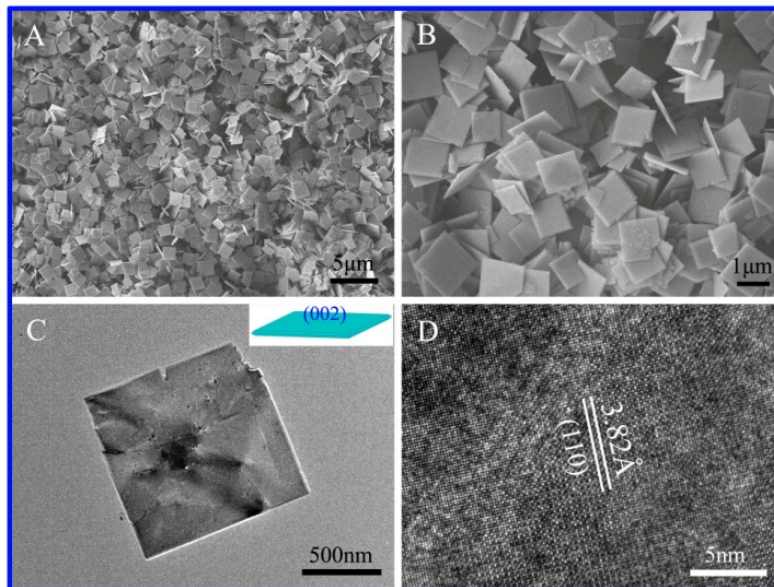

**Figure S3.** A, B) SEM images of  $\text{Cu}_2\text{MoS}_4$  nanosheet at different magnifications; C) TEM image of an individual horizontal  $\text{Cu}_2\text{MoS}_4$  nanosheet, the inset is schematic diagram of the  $\text{Cu}_2\text{MoS}_4$  nanosheet crystal structure with (002) faces dominated; D) typical HRTEM image of  $\text{Cu}_2\text{MoS}_4$  nanosheet.

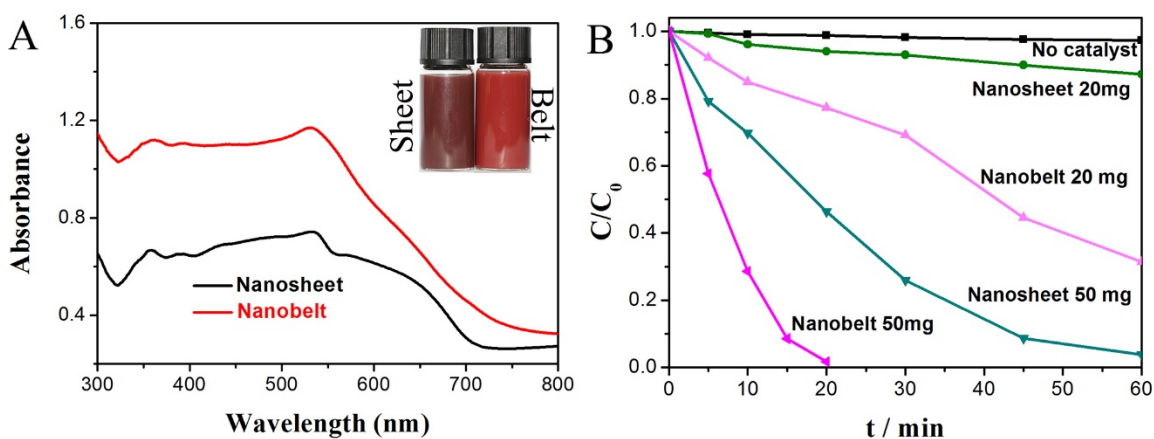

**Figure S4.** Diffuse reflectance absorption spectra of  $\text{Cu}_2\text{MoS}_4$  nanosheet and nanobelt. The inset shows the photographs of the samples dispersed in ethanol. The bandgap value of  $\text{Cu}_2\text{MoS}_4$  nanosheet and nanobelt are estimated as 1.75 eV and 1.71 eV, respectively. B) Photocatalytic activities of  $\text{Cu}_2\text{MoS}_4$  samples for MO degradation under visible-light irradiation ( $\lambda > 420 \text{ nm}$ )

## References

- [1] D. F. Zhang, H. Zhang, L. Guo, K. Zheng, X. D. Han, Z. Zhang, *J. Mater. Chem. A*, **2009**, 19, 5220-5225.
- [2] W. X. Chen, H. P. Zhu, H. T. Zhu, Q. Q. Gao, J. Luo, Y. Wang, S. Zhang, K. Zhang, C. M. Wang, Y.

J. Xiong, Y. F. Wu, X. S. Zheng, W. S. Chu, L. Song, Z. Y. Wu, *Small*, **2014**, 10, 4637-4644.
